# Supplementary material for: Association Between Hormone-Modulating Breast Cancer Therapies and Incidence of Neurodegenerative Outcomes for Women With Breast Cancer
Source: PubMed Central journal article supplement (PMC7093781; doi:10.1001/jamanetworkopen.2020.1541), 2020-03-24
Supplement: jamanetwopen-3-e201541-s001.pdf [file jamanetwopen-3-e201541-s001.pdf]

## Supplementary Online Content

Branigan GL, Soto M, Neumayer L, Rodgers K, Brinton RD. Association between hormone-modulating breast cancer therapies and incidence of neurodegenerative outcomes for women with breast cancer. *JAMA Netw Open*. 2020;3(3):e201541. doi:10.1001/jamanetworkopen.2020.1541

**eTable 1.** List of HMT and Number of Patients Taking HMT

**eTable 2.** List of Hormone Modulating Therapy Drug Codes Used

**eTable 3.** List of Chemotherapy Drug Codes Used

**eTable 4.** List of Diagnose Codes Used

**eFigure 1.** Reduced Risk of All NDD, AD, and Dementia in Propensity Score–Matched Patients With HMT Exposure Across All Age Groups

**eFigure 2.** Patient Breakdown Without Chemotherapy

**eTable 5.** Relative Risk of Patients Without Chemotherapy Taking HMT to Develop NDDs

**eFigure 3.** Age-Dependent Reduction in Risk for All NDD and Alzheimer Disease Is Not Associated With HMT Exposure for Patients Less Than 70 Years of Age

**eFigure 4.** Steroidal Aromatase Inhibitors Are Associated With the Protective Effects Seen Within the Aromatase Inhibitor Group

This supplementary material has been provided by the authors to give readers additional information about their work.

**eTable 1.** List of HMT and Number of Patients Taking HMT

| <b>Drug</b>                 | <b>n (%)</b>  | <b>Median<br/>% Adherence</b> | <b>Average<br/>Daily Dose</b> | <b>Median Time<br/>Between BCA<br/>Diagnosis and<br/>Start of Therapy<br/>(days)</b> |
|-----------------------------|---------------|-------------------------------|-------------------------------|--------------------------------------------------------------------------------------|
| Raloxifene<br>Hydrochloride | 1,972 (10.88) | 86.86%                        | 59.92                         | 75                                                                                   |
| Tamoxifen Citrate           | 5,335 (29.43) | 89.50%                        | 19.96                         | 188                                                                                  |
| Tamoxifen, other            | 0             | n/a                           | n/a                           | n/a                                                                                  |
| Anastrozole                 | 9,819 (54.17) | 94.68%                        | 1                             | 125                                                                                  |
| Letrozole                   | 4,663 (25.72) | 92.92%                        | 2.5                           | 126                                                                                  |
| Fulvestrant                 | 33 (0.18)     | 91.38%                        | 18.07                         | 1000                                                                                 |
| Exemestane                  | 1,550 (8.55)  | 93.46%                        | 25                            | 465                                                                                  |

**eTable 2.** List of Hormone Modulating Therapy  
Drug Codes Used

| <b>Drug</b>                 |                     |
|-----------------------------|---------------------|
| Raloxifene<br>Hydrochloride | GENERIC_DRUG-100578 |
| Tamoxifen<br>Citrate        | GENERIC_DRUG-100858 |
| Tamoxifen,<br>other         | GENERIC_DRUG-103413 |
| Anastrozole                 | GENERIC_DRUG-101513 |
| Letrozole                   | GENERIC_DRUG-104120 |
| Fulvestrant                 | GENERIC_DRUG-105312 |
| Exemestane                  | GENERIC_DRUG-105517 |

**eTable 3.** List of Chemotherapy Drug Codes Used

| <b>Drug</b>      |                                                                     |
|------------------|---------------------------------------------------------------------|
| Trastuzumab      | GENERIC_DRUG-108717                                                 |
| Epirubicin       | GENERIC_DRUG-102011                                                 |
| Fluorouracil     | GENERIC_DRUG-101933,<br>GENERIC_DRUG-104504,<br>GENERIC_DRUG-104268 |
| Paclitaxel       | GENERIC_DRUG-100259                                                 |
| Vinblastine      | GENERIC_DRUG-102905                                                 |
| Doxorubicin      | GENERIC_DRUG-102078                                                 |
| Daunorubicin     | GENERIC_DRUG-107513,<br>GENERIC_DRUG-107300                         |
| Gemcitabine      | GENERIC_DRUG-102442,<br>GENERIC_DRUG-101042                         |
| Thiotepa         | GENERIC_DRUG-110262                                                 |
| Capecitabine     | GENERIC_DRUG-103321                                                 |
| Carboplatin      | GENERIC_DRUG-104932                                                 |
| Cyclophosphamide | GENERIC_DRUG-100227                                                 |
| Methotrexate     | GENERIC_DRUG-100152                                                 |
| Vincristine      | GENERIC_DRUG-102853                                                 |
| Cisplatin        | GENERIC_DRUG-104152                                                 |

**eTable 4.** List of Diagnose Codes Used

| Diagnosis     | ICD-9                                                                                                                                                                                                                                                                                                                                         | ICD-10                                                                                                                                                                                                                                                                                                                                                                                                                                                                                                                                                                                                                                                                                                                                                                                                                                                                                                                                                                                                                                                                                                                                                                                                                                                                                                                                            |
|---------------|-----------------------------------------------------------------------------------------------------------------------------------------------------------------------------------------------------------------------------------------------------------------------------------------------------------------------------------------------|---------------------------------------------------------------------------------------------------------------------------------------------------------------------------------------------------------------------------------------------------------------------------------------------------------------------------------------------------------------------------------------------------------------------------------------------------------------------------------------------------------------------------------------------------------------------------------------------------------------------------------------------------------------------------------------------------------------------------------------------------------------------------------------------------------------------------------------------------------------------------------------------------------------------------------------------------------------------------------------------------------------------------------------------------------------------------------------------------------------------------------------------------------------------------------------------------------------------------------------------------------------------------------------------------------------------------------------------------|
| Breast Cancer | ICD-9-D-1740, ICD-9-D-1741, ICD-9-D-1742, ICD-9-D-1743, ICD-9-D-1744, ICD-9-D-1745, ICD-9-D-1746, ICD-9-D-1748, ICD-9-D-1749, ICD-9-D-1750, ICD-9-D-1759, ICD-9-D-19881, ICD-9-D-217, ICD-9-D-2330, ICD-9-D-2383, ICD-9-D-2393,                                                                                                               | ICD-10-D-C4352, ICD-10-D-C44501, ICD-10-D-C44511, ICD-10-D-C44521, ICD-10-D-C44591, ICD-10-D-C4A52, ICD-10-D-C50011, ICD-10-D-C50012, ICD-10-D-C50019, ICD-10-D-C50021, ICD-10-D-C50022, ICD-10-D-C50029, ICD-10-D-C50111, ICD-10-D-C50112, ICD-10-D-C50119, ICD-10-D-C50121, ICD-10-D-C50122, ICD-10-D-C50129, ICD-10-D-C50211, ICD-10-D-C50212, ICD-10-D-C50219, ICD-10-D-C50221, ICD-10-D-C50222, ICD-10-D-C50311, ICD-10-D-C50312, ICD-10-D-C50319, ICD-10-D-C50321, ICD-10-D-C50322, ICD-10-D-C50329, ICD-10-D-C50411, ICD-10-D-C50412, ICD-10-D-C50419, ICD-10-D-C50421, ICD-10-D-C50422, ICD-10-D-C50429, ICD-10-D-C50511, ICD-10-D-C50512, ICD-10-D-C50519, ICD-10-D-C50521, ICD-10-D-C50522, ICD-10-D-C50611, ICD-10-D-C50612, ICD-10-D-C50619, ICD-10-D-C50621, ICD-10-D-C50622, ICD-10-D-C50811, ICD-10-D-C50812, ICD-10-D-C50819, ICD-10-D-C50821, ICD-10-D-C50822, ICD-10-D-C50829, ICD-10-D-C50911, ICD-10-D-C50912, ICD-10-D-C50919, ICD-10-D-C50921, ICD-10-D-C50922, ICD-10-D-C50929, ICD-10-D-C7981, ICD-10-D-D0352, ICD-10-D-D0500, ICD-10-D-D0501, ICD-10-D-D0502, ICD-10-D-D0510, ICD-10-D-D0511, ICD-10-D-D0512, ICD-10-D-D0580, ICD-10-D-D0581, ICD-10-D-D0582, ICD-10-D-D0590, ICD-10-D-D0591, ICD-10-D-D0592, ICD-10-D-D241, ICD-10-D-D242, ICD-10-D-D249, ICD-10-D-D4860, ICD-10-D-D4861, ICD-10-D-D4862, ICD-10-D-D493 |
| NDD           | See AD, Dementia, MS, Parkinson, and ALS Codes                                                                                                                                                                                                                                                                                                |                                                                                                                                                                                                                                                                                                                                                                                                                                                                                                                                                                                                                                                                                                                                                                                                                                                                                                                                                                                                                                                                                                                                                                                                                                                                                                                                                   |
| AD            | ICD-9-D-3310                                                                                                                                                                                                                                                                                                                                  | ICD-10-D-G300, ICD-10-D-G301, ICD-10-D-G308, ICD-10-D-G309                                                                                                                                                                                                                                                                                                                                                                                                                                                                                                                                                                                                                                                                                                                                                                                                                                                                                                                                                                                                                                                                                                                                                                                                                                                                                        |
| Dementia      | ICD-9-D-2900, ICD-9-D-29010, ICD-9-D-29011, ICD-9-D-29012, ICD-9-D-29013, ICD-9-D-29020, ICD-9-D-29021, ICD-9-D-2903, ICD-9-D-29040, ICD-9-D-29041, ICD-9-D-29042, ICD-9-D-29043, ICD-9-D-29410, ICD-9-D-29411, ICD-9-D-29420, ICD-9-D-29421, ICD-9-D-33119, ICD-9-D-33182                                                                    | ICD-10-D-F0150, ICD-10-D-F0151, ICD-10-D-F0280, ICD-10-D-F0281, ICD-10-D-F0390, ICD-10-D-F0391, ICD-10-D-G3109, ICD-10-D-G3183                                                                                                                                                                                                                                                                                                                                                                                                                                                                                                                                                                                                                                                                                                                                                                                                                                                                                                                                                                                                                                                                                                                                                                                                                    |
| MS            | ICD-9-D-340                                                                                                                                                                                                                                                                                                                                   | ICD-10-D-G35                                                                                                                                                                                                                                                                                                                                                                                                                                                                                                                                                                                                                                                                                                                                                                                                                                                                                                                                                                                                                                                                                                                                                                                                                                                                                                                                      |
| Parkinson's   | ICD-9-D-332, ICD-9-D-3320                                                                                                                                                                                                                                                                                                                     | ICD-10-D-G20, ICD-10-D-G214                                                                                                                                                                                                                                                                                                                                                                                                                                                                                                                                                                                                                                                                                                                                                                                                                                                                                                                                                                                                                                                                                                                                                                                                                                                                                                                       |
| ALS           | ICD-9-D-33520                                                                                                                                                                                                                                                                                                                                 | ICD-10-D-G1221                                                                                                                                                                                                                                                                                                                                                                                                                                                                                                                                                                                                                                                                                                                                                                                                                                                                                                                                                                                                                                                                                                                                                                                                                                                                                                                                    |
| T2D           | ICD-9-D-25000, ICD-9-D-25001, ICD-9-D-25002, ICD-9-D-25003                                                                                                                                                                                                                                                                                    | ICD-10-D-E108, ICD-10-D-E109, ICD-10-D-E1169, ICD-10-D-E118, ICD-10-D-E119                                                                                                                                                                                                                                                                                                                                                                                                                                                                                                                                                                                                                                                                                                                                                                                                                                                                                                                                                                                                                                                                                                                                                                                                                                                                        |
| HTN           | ICD-9-D-4010, ICD-9-D-4011, ICD-9-D-4019                                                                                                                                                                                                                                                                                                      | ICD-10-D-I10, ICD-10-D-I110, ICD-10-D-I119                                                                                                                                                                                                                                                                                                                                                                                                                                                                                                                                                                                                                                                                                                                                                                                                                                                                                                                                                                                                                                                                                                                                                                                                                                                                                                        |
| COPD          | ICD-9-D-49120, ICD-9-D-49121, ICD-9-D-49122, ICD-9-D-49320, ICD-9-D-49321, ICD-9-D-49322                                                                                                                                                                                                                                                      | ICD-10-D-J440, ICD-10-D-J441, ICD-10-D-J449                                                                                                                                                                                                                                                                                                                                                                                                                                                                                                                                                                                                                                                                                                                                                                                                                                                                                                                                                                                                                                                                                                                                                                                                                                                                                                       |
| CKD           | ICD-9-D-5851, ICD-9-D-5852, ICD-9-D-5853, ICD-9-D-5854, ICD-9-D-5855, ICD-9-D-5859                                                                                                                                                                                                                                                            | ICD-10-D-N181, ICD-10-D-N182, ICD-10-D-N183, ICD-10-D-N184, ICD-10-D-N185, ICD-10-D-N189                                                                                                                                                                                                                                                                                                                                                                                                                                                                                                                                                                                                                                                                                                                                                                                                                                                                                                                                                                                                                                                                                                                                                                                                                                                          |
| CVD           | ICD-9-D-4149, ICD-9-D-4280, ICD-9-D-4281, ICD-9-D-42820, ICD-9-D-42821, ICD-9-D-42822, ICD-9-D-42823, ICD-9-D-42830, ICD-9-D-42831, ICD-9-D-42832, ICD-9-D-42833, ICD-9-D-42840, ICD-9-D-42841, ICD-9-D-42842, ICD-9-D-42843, ICD-9-D-4289, ICD-9-D-4292                                                                                      | ICD-10-D-I25700, ICD-10-D-I25708, ICD-10-D-I25709, ICD-10-D-I25710, ICD-10-D-I25719, ICD-10-D-I25720, ICD-10-D-I25729, ICD-10-D-I25739, ICD-10-D-I25798, ICD-10-D-I25799, ICD-10-D-I25810, ICD-10-D-I25811, ICD-10-D-I2582, ICD-10-D-I2583, ICD-10-D-I2584, ICD-10-D-I2589, ICD-10-D-I259, ICD-10-D-I501, ICD-10-D-I5043, ICD-10-D-I509                                                                                                                                                                                                                                                                                                                                                                                                                                                                                                                                                                                                                                                                                                                                                                                                                                                                                                                                                                                                           |
| Stroke        | ICD-9-D-430, ICD-9-D-431, ICD-9-D-432, ICD-9-D-4320, ICD-9-D-4321, ICD-9-D-4329, ICD-9-D-43300, ICD-9-D-4331, ICD-9-D-43310, ICD-9-D-43311, ICD-9-D-43320, ICD-9-D-43321, ICD-9-D-43330, ICD-9-D-43331, ICD-9-D-43381, ICD-9-D-43390, ICD-9-D-43391, ICD-9-D-43400, ICD-9-D-43401, ICD-9-D-43410, ICD-9-D-43411, ICD-9-D-43490, ICD-9-D-43491 | ICD-10-D-I6300, ICD-10-D-I63011, ICD-10-D-I63012, ICD-10-D-I63031, ICD-10-D-I63032, ICD-10-D-I6310, ICD-10-D-I63139, ICD-10-D-I63232, ICD-10-D-I63233, ICD-10-D-I63239, ICD-10-D-I63312, ICD-10-D-I6339, ICD-10-D-I6340, ICD-10-D-I63411, ICD-10-D-I63432, ICD-10-D-I6350, ICD-10-D-I63512, ICD-10-D-I63519, ICD-10-D-I63529, ICD-10-D-I6359, ICD-10-D-I638, ICD-10-D-I639                                                                                                                                                                                                                                                                                                                                                                                                                                                                                                                                                                                                                                                                                                                                                                                                                                                                                                                                                                        |

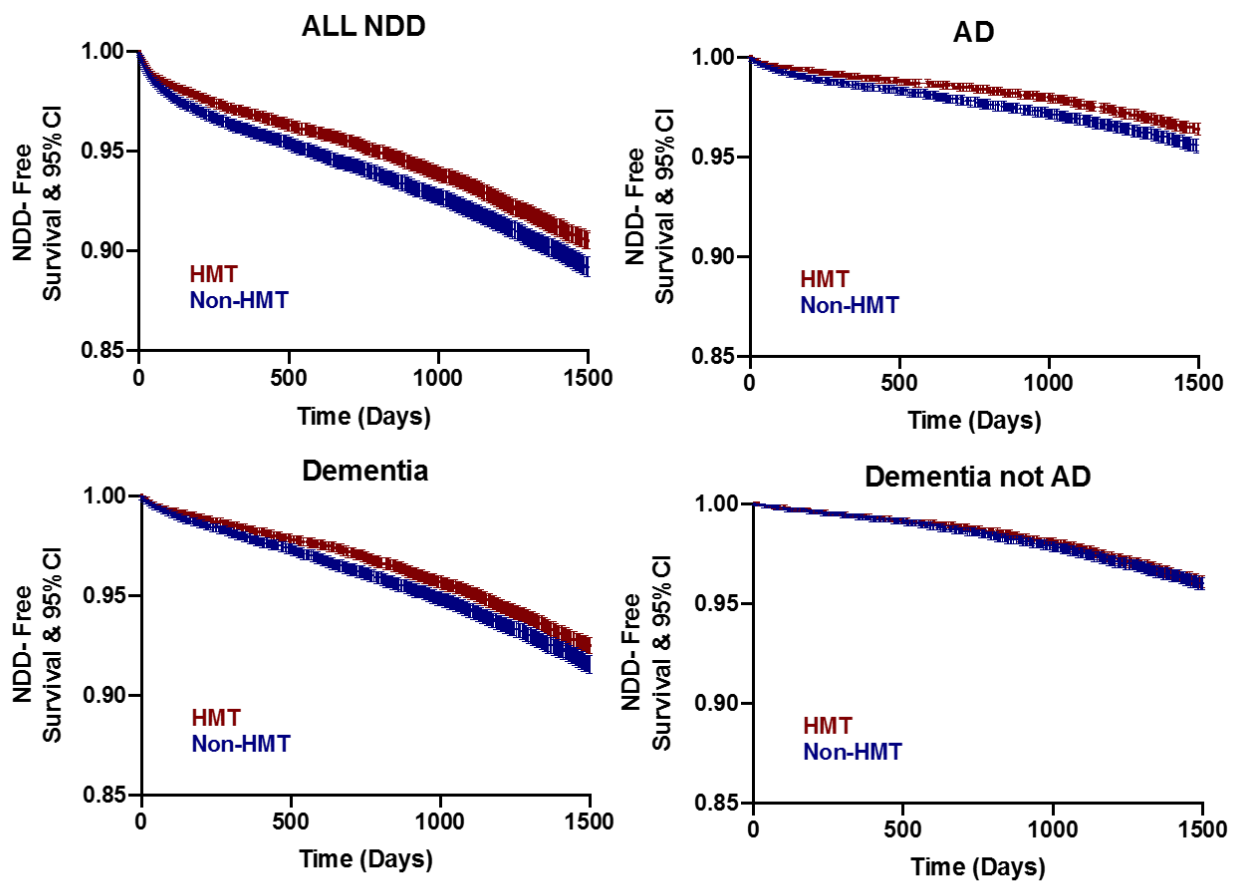

Figure 1. Reduced risk of all NDD, AD and Dementia in propensity score matched patients with HMT exposure across all age groups.

Abbreviations: HMT, hormone modulating therapy; All NDD, All Neurodegenerative Disease Composite Group; AD, Alzheimer's Disease; Dem, dementia; Dem no AD, non-Alzheimer's type dementia

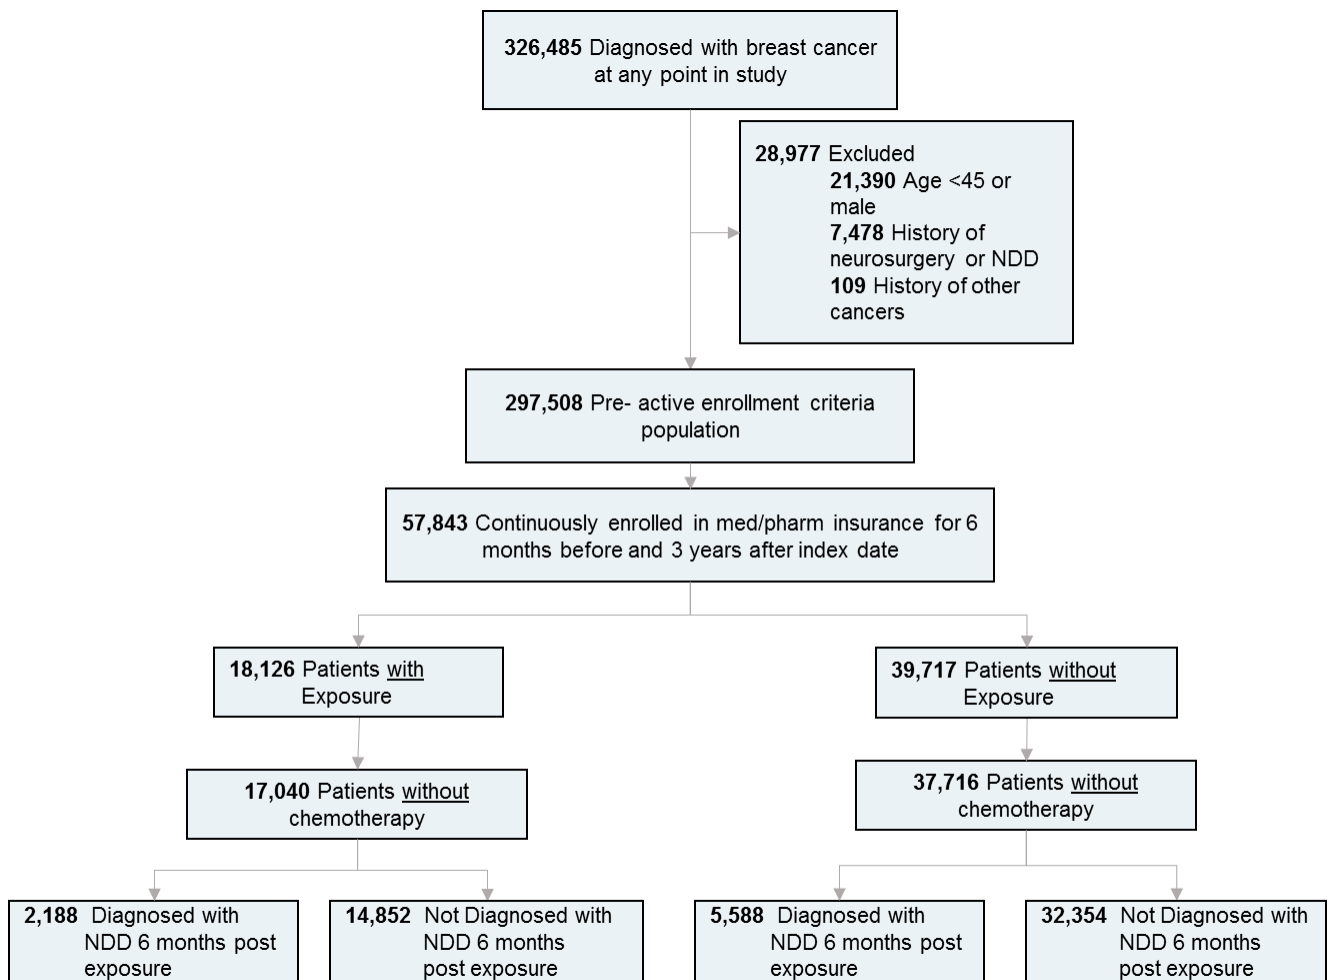

**eFigure 2. Patient breakdown without chemotherapy**

Abbreviations: DOI, drug of interest; NDD, neurodegenerative disease

|                      | <i>Unadjusted without Chemotherapy</i>      |              |              |                   |
|----------------------|---------------------------------------------|--------------|--------------|-------------------|
|                      | <b>Patients with HMT exposure</b>           |              |              |                   |
|                      | <b>ALL NDD</b>                              | <b>AD</b>    | <b>Dem</b>   | <b>Dem not AD</b> |
| <b># Patients</b>    | 2,188                                       | 878          | 1,823        | 1,016             |
| <b>%</b>             | 12.84                                       | 5.15         | 10.70        | 5.96              |
|                      | <b>Patients <u>without</u> HMT exposure</b> |              |              |                   |
| <b># Patients</b>    | 5,588                                       | 2,362        | 4,734        | 2,529             |
| <b>%</b>             | 14.82                                       | 6.62         | 12.55        | 6.71              |
| <b>Relative Risk</b> | 0.87                                        | 0.82         | 0.85         | 0.89              |
| <b>95%CI</b>         | 0.83 to 0.91                                | 0.76 to 0.89 | 0.81 to 0.90 | 0.83 to 0.95      |
| <b>NNT</b>           | 50.62                                       | 90.09        | 53.96        | 134.6             |
| <b>p-value</b>       | <0.001                                      | <0.001       | <0.001       | 0.001             |

**eTable 5. Relative risk of patients without chemotherapy taking HMT to develop NDDs**

Abbreviation: HMT, hormone modulating therapy; AD, Alzheimer’s Disease; Dem, dementia; Dem no AD, non-Alzheimer’s type dementia



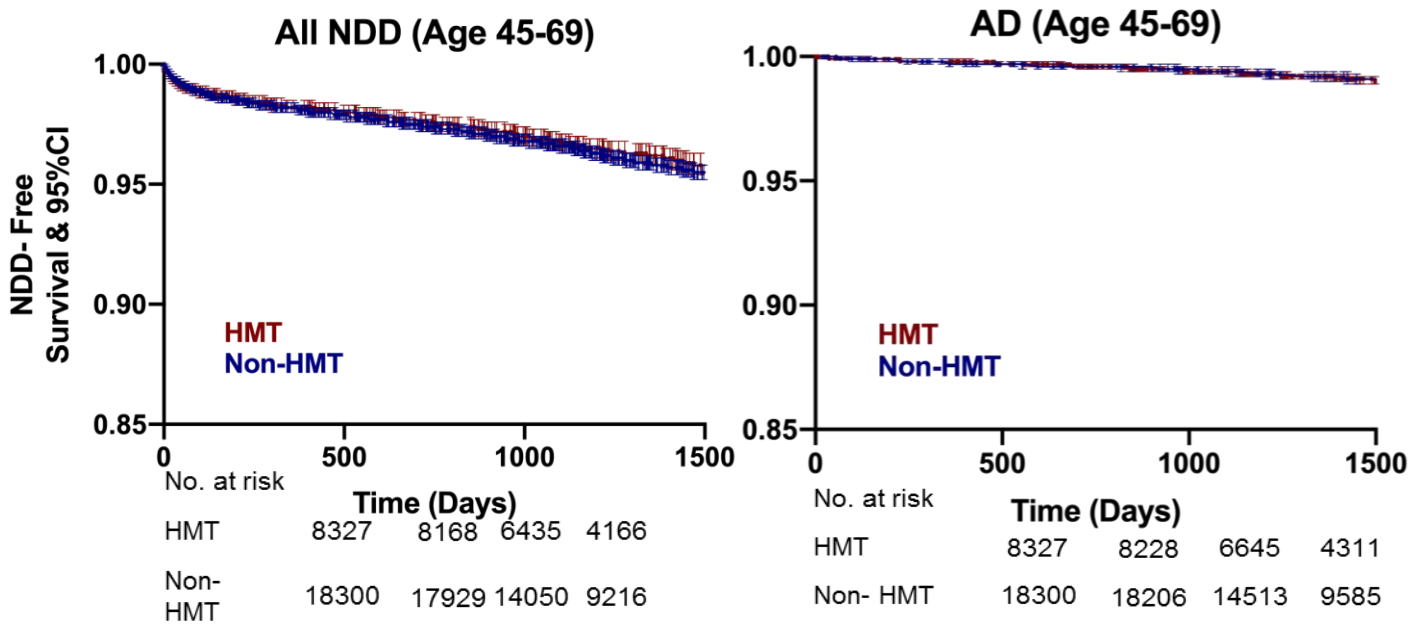

**eFigure 3. Age-dependent reduction in risk for All NDD and Alzheimer's Disease is not associated with HMT exposure for patients less than 70 years of age.**

Abbreviations: Non-HMT, Patients not exposed to hormone modulating therapy (HMT); HMT, Patients exposed to HMT

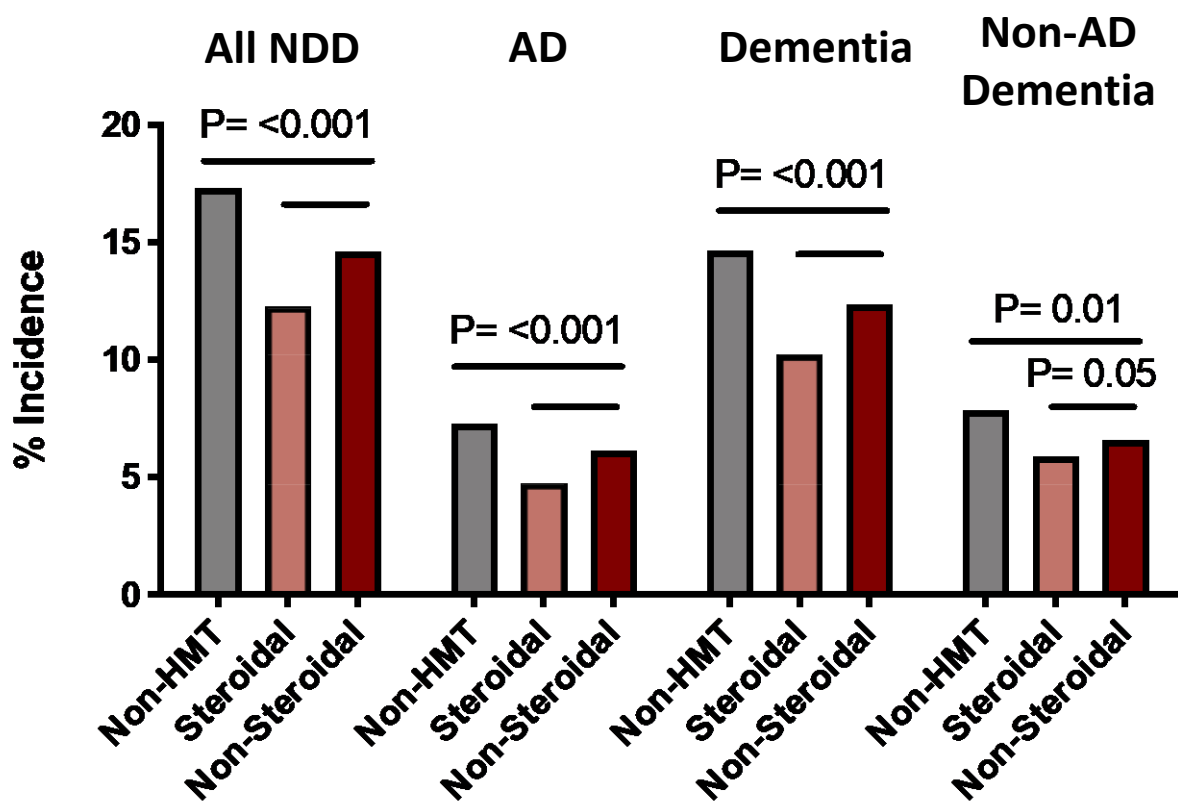

**eFigure 4. Steroidal aromatase inhibitors are associated with the protective effects seen within the aromatase inhibitor group.**

Abbreviations: Non-HMT, Patients not exposed to hormone modulating therapy (HMT); Steroidal, Steroidal Aromatase inhibitor (exemestane); Non-Steroidal, Non-steroidal aromatase inhibitors (anastrozole and letrozole)
